# Supplementary material
Source: MDPI journal article supplement (https://www.mdpi.com/2073-4395/12/3/676)
Supplement: s1 [file s1]

# Biocontrol of *Macrophomina phaseolina* using *Bacillus amyloliquefaciens* strains in cowpea (*Vigna unguiculata*)

Edelweiss Airam Rangel-Montoya, Carmen Sanjuana Delgado-Ramírez, Edgardo Sepulveda, Rufina Hernández-Martínez

## Supplementary Material

**Table S1.** List of GenBank and culture accession numbers of *Macrophomina* used in this study for phylogenetic analysis.

| Species                          | Isolate      | Host                                          | Origin       | GeneBank accession number |                |
|----------------------------------|--------------|-----------------------------------------------|--------------|---------------------------|----------------|
|                                  |              |                                               |              | ITS                       | tef1- $\alpha$ |
| <i>Macrophomina phaseolina</i>   | KARE885      | <i>Prunus dulcis</i>                          | USA          | MN166021                  | MN318094       |
| <i>M. phaseolina</i>             | CBS 162.25   | <i>Eucalyptus</i> sp.                         | Italy        | KF531826                  | KF951996       |
| <i>M. phaseolina</i>             | CPMM         | <i>Opuntia ficus-indica</i>                   | Italy        | KT261801                  | KT261797       |
| <i>M. phaseolina</i>             | FDe13MX      | <i>Fragaria x ananassa</i>                    | Mexico       | MW651771                  | MZ044245       |
| <i>M. phaseolina</i>             | FDe23MX      | <i>Fragaria x ananassa</i>                    | Mexico       | MW651772                  | MZ044246       |
| <i>M. pseudophaseolina</i>       | CPC 21417    | <i>Arachis hypogaea</i>                       | Senegal      | KF951791                  | KF952153       |
| <i>M. pseudophaseolina</i>       | CPC 21458    | <i>Arachis hypogaea</i>                       | Senegal      | KF951793                  | KF952155       |
| <i>M. vaccinii</i>               | CGMCC3.19508 | <i>Vaccinium corymbosum</i>                   | China        | MK687455                  | MK687431       |
| <i>M. vaccinii</i>               | CGMCC3.19509 | <i>Vaccinium corymbosum</i>                   | China        | MK687456                  | MK687432       |
| <i>Neoscytalidium dimidiatum</i> | CBS 251.49   | <i>Juglans regia</i>                          | USA          | KF531819                  | KF531797       |
| <i>N. dimidiatum</i>             | CBS 145.78   | <i>Homo sapiens</i>                           | UK           | KF531816                  | KF531795       |
| <i>N. dimidiatum</i>             | CBS 499.66   | <i>Mangifera indica</i>                       | Mali         | KF531820                  | KF531798       |
| <i>Dothiorella viticola</i>      | STE-U 6139   | <i>Prunus persica</i> var. <i>nucipersica</i> | South Africa | EF445360                  | EF445393       |

Isolates from this study are highlighted in bold text.

**Table S2.** List of GenBank and culture accession numbers of *Bacillus* used in this study for phylogenetic analysis.

| Species                                | Isolate        | Isolation source         | Origin        | 16S rRNA GeneBank accession number |
|----------------------------------------|----------------|--------------------------|---------------|------------------------------------|
| <i>Bacillus amyloliquefaciens</i>      | NBRC 15535     | soil                     | Japan         | NR_112685                          |
| <i>B. amyloliquefaciens</i>            | W9             | marine water sample      | India         | MH188056                           |
| <i>B. amyloliquefaciens</i>            | AB-525         | rice cake                | China         | KJ879953                           |
| <b><i>B. amyloliquefaciens</i></b>     | <b>BsA3MX</b>  | <b>Strawberry plant</b>  | <b>Mexico</b> | <b>MW651769</b>                    |
| <b><i>B. amyloliquefaciens</i></b>     | <b>BsC11MX</b> | <b>Strawberry plant</b>  | <b>Mexico</b> | <b>MW651770</b>                    |
| <i>B. axarquiensis</i>                 | CIP 108772     | river-mouth sediments    | Spain         | DQ993670                           |
| <i>B. cereus</i>                       | ATCC 14579     | unknown                  | unknown       | AE016877                           |
| <i>B. circulans</i>                    | IAMI 12462     | soil                     | unknown       | D78312                             |
| <i>B. coagulans</i>                    | NBRC 12583     | evaporated milk          | unknown       | AB271752                           |
| <i>B. licheniformis</i>                | ATCC 14580     | unknown                  | unknown       | CP000002                           |
| <i>B. mojavensis</i>                   | IFO 15718      | soil                     | USA           | AB021191                           |
| <i>B. mycoides</i>                     | ATCC 6462      | soil                     | unknown       | AB021192                           |
| <i>B. siamensis</i>                    | PD-A10         | poo-dong                 | Thailand      | GQ281299                           |
| <i>B. siamensis</i>                    | RET2912        | landfill soil            | India         | MN530054                           |
| <i>B. siamensis</i>                    | LFS1715        | landfill soil            | India         | MN519261                           |
| <i>B. subtilis</i>                     | DSM10          | unknown                  | unknown       | AJ276351                           |
| <i>B. subtilis subsp. spizizenii</i>   | NBRL B-23049   | tunisian desert          | Tunisia       | AF074970                           |
| <i>B. thuringiensis</i>                | IAM 12077      | mediterranean flour moth | unknown       | D16281                             |
| <i>B. vallismortis</i>                 | DSM 11031      | soil                     | USA           | AB021198                           |
| <i>B. velezensis</i>                   | CR-502         | brackish water           | Spain         | AY603658                           |
| <i>Alicyclobacillus acidocaldarius</i> | DSM 446        | acid hot spring          | USA           | AJ496806                           |

Isolates from this study are highlighted in bold text.
